# Supplementary material for: Electronic Alert System for Improving Stroke Prevention Among Hospitalized Oral‐Anticoagulation‐Naïve Patients With Atrial Fibrillation: A Randomized Trial
Source: PubMed Central journal article supplement — J Am Heart Assoc. 2016 Jul 22;5(7):e003776. doi: 10.1161/JAHA.116.003776 (PMC5015408; doi:10.1161/jaha.116.003776), 2016-07-22
Supplement: JAH3-5-e003776-s001.pdf [file JAH3-5-e003776-s001.pdf]

## **SUPPLEMENTAL MATERIAL**

**Table S1.** The categories of the CHA<sub>2</sub>DS<sub>2</sub>-VASC-Score stratified for randomization group

| CHA <sub>2</sub> DS <sub>2</sub> VASC-Score | Group     |           |
|---------------------------------------------|-----------|-----------|
|                                             | Control   | Alert     |
| 0                                           | 15 (3.5)  | 8 (1.8)   |
| 1 (women)                                   | 6 (1.4)   | 4 (0.9)   |
| 1 (men)                                     | 38 (8.8)  | 39 (8.6)  |
| 2                                           | 69 (15.9) | 57 (12.5) |
| 3                                           | 89 (20.5) | 98 (21.5) |
| 4                                           | 87 (20.0) | 97 (21.3) |
| 5                                           | 75 (17.3) | 63 (13.8) |
| 6                                           | 30 (6.9)  | 57 (12.5) |
| 7                                           | 19 (4.4)  | 24 (5.3)  |
| 8                                           | 6 (1.4)   | 8 (1.8)   |
| 9                                           | 0 (0.0)   | 0 (0.0)   |

Values are numbers and percentages.

**Table S2.** The categories of the HASBLED-Score stratified for randomization group

| HASBLED-Score | Group      |            |
|---------------|------------|------------|
|               | Control    | Alert      |
| 0             | 32 (7.4)   | 25 (5.5)   |
| 1             | 79 (18.2)  | 84 (18.5)  |
| 2             | 140 (32.3) | 138 (30.3) |
| 3             | 112 (25.8) | 136 (29.9) |
| 4             | 55 (12.7)  | 56 (12.3)  |
| 5             | 13 (3.0)   | 14 (3.1)   |
| 6             | 3 (0.7)    | 2 (0.4)    |
| 7             | 0 (0.0)    | 0 (0.0)    |
| 8             | 0 (0.0)    | 0 (0.0)    |
| 9             | 0 (0.0)    | 0 (0.0)    |

Values are numbers and percentages.

CHA2DS2-VASc Score

### CHA2DS2 - VASc SCORE

| CHA2DS2 - VASc                                                               | Points       | Please mark                         |
|------------------------------------------------------------------------------|--------------|-------------------------------------|
| Heart Failure or Ejection Fraction $\geq$ 35%                                | 1            | <input type="checkbox"/>            |
| Hypertension                                                                 | 1            | <input type="checkbox"/>            |
| Age $\geq$ 75 years                                                          | 2            | <input type="checkbox"/>            |
| Diabetes mellitus                                                            | 1            | <input type="checkbox"/>            |
| Stroke, TIA or Systemic Emboli                                               | 2            | <input type="checkbox"/>            |
| Vascular disease (previous MI, peripheral arterial disease or aortic plaque) | 1            | <input type="checkbox"/>            |
| Age $\geq$ 65 and $<$ 75 years                                               | 1            | <input type="checkbox"/>            |
| Sex (female) (is filled in automatically by the alert system)                | 1            | <input checked="" type="checkbox"/> |
| <b>CHA2DS2-VASc score</b>                                                    | <b>Max 9</b> | <b>Total: 1</b>                     |






**Figure S1.** CHA<sub>2</sub>DS<sub>2</sub>-VASc score calculation tool for physicians in charge of patients with atrial fibrillation but without ongoing oral anticoagulant treatment
